# Supplementary material for: Characterization of the ATPase FlaI of the motor complex of the Pyrococcus furiosus archaellum and its interactions between the ATP-binding protein FlaH
Source: PeerJ. 2018 Jun 18;6:e4984. doi: 10.7717/peerj.4984 (PMC6011876; doi:10.7717/peerj.4984)
Supplement: Data S1 — All SDS-PAGE images and excel tables for all shown graphs. [file peerj-06-4984-s002.xlsx]

## Sheet: Fig. 2A
	volume	Pf FlaI	SaFlaI
	[ml]	[au]	[au]
	5.03	-0.01963	-0.00725
	5.07	-0.01858	-0.00743
	5.11	-0.0186	-0.00743
	5.15	-0.01876	-0.00743
	5.19	-0.01867	-0.00743
	5.23	-0.01853	-0.00749
	5.27	-0.0185	-0.00761
	5.31	-0.01869	-0.00764
	5.35	-0.01972	-0.00761
	5.39	-0.01826	-0.0077
	5.43	-0.01662	-0.00773
	5.47	-0.01644	-0.0077
	5.51	-0.0164	-0.00776
	5.55	-0.01619	-0.00776
	5.59	-0.01683	-0.00776
	5.63	-0.01713	-0.00776
	5.67	-0.0177	-0.00782
	5.71	-0.01803	-0.00791
	5.75	-0.01947	-0.00791
	5.79	-0.01931	-0.00797
	5.83	-0.01819	-0.00794
	5.87	-0.01892	-0.00782
	5.91	-0.01807	-0.00791
	5.95	-0.01811	-0.00797
	5.99	-0.01881	-0.00806
	6.03	-0.0188	-0.00806
	6.07	-0.01848	-0.008
	6.11	-0.01823	-0.00797
	6.15	-0.01894	-0.00797
	6.19	-0.01938	-0.008
	6.23	-0.01943	-0.00803
	6.27	-0.01789	-0.00809
	6.31	-0.01936	-0.00803
	6.35	-0.01924	-0.00812
	6.39	-0.01912	-0.00818
	6.43	-0.01821	-0.00821
	6.47	-0.01667	-0.00818
	6.51	-0.01639	-0.00818
	6.55	-0.01681	-0.00823
	6.59	-0.01699	-0.00826
	6.63	-0.01733	-0.00826
	6.67	-0.01717	-0.00818
	6.71	-0.01623	-0.00821
	6.75	-0.01695	-0.00821
	6.79	-0.01773	-0.00815
	6.83	-0.01555	-0.00812
	6.87	-0.01534	-0.00815
	6.91	-0.01458	-0.00803
	6.95	-0.01431	-0.00803
	6.99	-0.01237	-0.008
	7.03	-0.01097	-0.00806
	7.07	-0.00712	-0.00812
	7.11	-0.00367	-0.008
	7.15	0.00184	-0.00797
	7.19	0.00764	-0.00797
	7.23	0.01564	-0.00791
	7.27	0.0265	-0.008
	7.31	0.03761	-0.008
	7.35	0.05168	-0.00791
	7.39	0.06785	-0.00797
	7.43	0.08704	-0.00809
	7.47	0.10764	-0.00809
	7.51	0.12741	-0.00803
	7.55	0.14617	-0.008
	7.59	0.16298	-0.00803
	7.63	0.17879	-0.00812
	7.67	0.19546	-0.00797
	7.71	0.20906	-0.00794
	7.75	0.22336	-0.00776
	7.79	0.23638	-0.00776
	7.83	0.25045	-0.00755
	7.87	0.26648	-0.00737
	7.91	0.28202	-0.00734
	7.95	0.29849	-0.00719
	7.99	0.31458	-0.00714
	8.03	0.33144	-0.00708
	8.07	0.34778	-0.00708
	8.1	0.36542	-0.00705
	8.14	0.38321	-0.00711
	8.18	0.40158	-0.00719
	8.22	0.42071	-0.00725
	8.26	0.43985	-0.00731
	8.3	0.45816	-0.00734
	8.34	0.47776	-0.00743
	8.38	0.49648	-0.00752
	8.42	0.5154	-0.00761
	8.46	0.53661	-0.00773
	8.5	0.55741	-0.00779
	8.54	0.57642	-0.00785
	8.58	0.59394	-0.00782
	8.62	0.61424	-0.00785
	8.66	0.63277	-0.00785
	8.7	0.65157	-0.00776
	8.74	0.66957	-0.00782
	8.78	0.68654	-0.00782
	8.82	0.70431	-0.00785
	8.86	0.7214	-0.0077
	8.9	0.73666	-0.00773
	8.94	0.75343	-0.00782
	8.98	0.77074	-0.00779
	9.02	0.78587	-0.00785
	9.06	0.80128	-0.0077
	9.1	0.81446	-0.00776
	9.14	0.82839	-0.00776
	9.18	0.84252	-0.00767
	9.22	0.85507	-0.00764
	9.26	0.8657	-0.00779
	9.3	0.87776	-0.00773
	9.34	0.88869	-0.00779
	9.38	0.89877	-0.00773
	9.42	0.90894	-0.00782
	9.46	0.91729	-0.00779
	9.5	0.92854	-0.00779
	9.54	0.93608	-0.00788
	9.58	0.94372	-0.00794
	9.62	0.95011	-0.00791
	9.66	0.9573	-0.00794
	9.7	0.96505	-0.00794
	9.74	0.97127	-0.00794
	9.78	0.97716	-0.00803
	9.82	0.9822	-0.00806
	9.86	0.98739	-0.00806
	9.9	0.9916	-0.00803
	9.94	0.99635	-0.00812
	9.98	0.99876	-0.00803
	10.02	1	-0.00797
	10.06	1.00039	-0.00803
	10.1	0.99826	-0.008
	10.14	0.99543	-0.00788
	10.18	0.99109	-0.00791
	10.22	0.98508	-0.00785
	10.26	0.97775	-0.00788
	10.3	0.96857	-0.00782
	10.34	0.95878	-0.00788
	10.38	0.94707	-0.00782
	10.42	0.93573	-0.00782
	10.46	0.92299	-0.00785
	10.5	0.91114	-0.00785
	10.54	0.89691	-0.00788
	10.58	0.88262	-0.00794
	10.62	0.86874	-0.00788
	10.66	0.85354	-0.00785
	10.7	0.83804	-0.00791
	10.74	0.82415	-0.00788
	10.78	0.81161	-0.00797
	10.82	0.79526	-0.008
	10.86	0.78018	-0.00806
	10.9	0.76626	-0.00821
	10.94	0.75076	-0.00809
	10.98	0.73549	-0.008
	11.02	0.71929	-0.00812
	11.06	0.70293	-0.00812
	11.1	0.68512	-0.00818
	11.14	0.66767	-0.00823
	11.18	0.65026	-0.00809
	11.22	0.63181	-0.00818
	11.26	0.613	-0.00821
	11.3	0.59612	-0.00821
	11.34	0.57897	-0.00821
	11.38	0.56189	-0.00812
	11.42	0.54541	-0.00812
	11.46	0.53	-0.00806
	11.5	0.51516	-0.00815
	11.54	0.5029	-0.00818
	11.58	0.49085	-0.00812
	11.62	0.47884	-0.00806
	11.66	0.46699	-0.00803
	11.7	0.4546	-0.00806
	11.74	0.4433	-0.00806
	11.78	0.42934	-0.00809
	11.82	0.41738	-0.00809
	11.86	0.40302	-0.008
	11.9	0.39168	-0.00803
	11.94	0.37674	-0.00785
	11.98	0.36316	-0.00782
	12.02	0.35003	-0.00788
	12.06	0.33837	-0.0077
	12.1	0.32498	-0.0077
	12.14	0.31382	-0.00764
	12.18	0.30118	-0.00755
	12.22	0.28997	-0.0074
	12.26	0.27865	-0.00722
	12.3	0.26908	-0.00711
	12.34	0.25865	-0.00702
	12.38	0.25023	-0.00681
	12.42	0.24067	-0.00675
	12.46	0.23156	-0.00642
	12.5	0.22373	-0.00604
	12.54	0.21652	-0.00568
	12.58	0.21158	-0.00538
	12.62	0.20471	-0.00485
	12.66	0.19728	-0.00416
	12.7	0.19087	-0.00342
	12.74	0.18421	-0.0025
	12.78	0.1793	-0.00152
	12.82	0.17358	-0.00024
	12.86	0.16787	0.00122
	12.9	0.16316	0.00303
	12.94	0.15737	0.00508
	12.98	0.15259	0.00749
	13.02	0.14674	0.01026
	13.06	0.14127	0.01341
	13.1	0.13491	0.01686
	13.14	0.12975	0.02078
	13.18	0.12429	0.02494
	13.22	0.11806	0.02952
	13.26	0.11205	0.03437
	13.3	0.1072	0.03975
	13.34	0.10107	0.04557
	13.38	0.09613	0.05253
	13.42	0.09255	0.0608
	13.46	0.08739	0.07129
	13.49	0.08231	0.08479
	13.53	0.07899	0.1026
	13.57	0.07634	0.12638
	13.61	0.0751	0.15742
	13.65	0.07235	0.19782
	13.69	0.07005	0.24764
	13.73	0.06773	0.30737
	13.77	0.0665	0.37447
	13.81	0.06434	0.44784
	13.85	0.06312	0.52386
	13.89	0.06177	0.59949
	13.93	0.06101	0.67295
	13.97	0.05997	0.74058
	14.01	0.06006	0.80251
	14.05	0.05894	0.85567
	14.09	0.05908	0.90085
	14.13	0.05825	0.93683
	14.17	0.05704	0.96459
	14.21	0.05655	0.98413
	14.25	0.05497	0.99518
	14.29	0.05368	1
	14.33	0.05182	0.99732
	14.37	0.051	0.98983
	14.41	0.05049	0.97678
	14.45	0.05033	0.9593
	14.49	0.04737	0.93843
	14.53	0.04606	0.91364
	14.57	0.04564	0.88706
	14.61	0.04732	0.85739
	14.65	0.04588	0.82644
	14.69	0.04507	0.7938
	14.73	0.04395	0.76003
	14.77	0.0428	0.72575
	14.81	0.04108	0.6904
	14.85	0.04027	0.65541
	14.89	0.03967	0.62021
	14.93	0.03664	0.58566
	14.97	0.03603	0.55079
	15.01	0.03506	0.51651
	15.05	0.03609	0.48319
	15.09	0.03501	0.4501
	15.13	0.03577	0.4185
	15.17	0.03552	0.38734
	15.21	0.03478	0.35764
	15.25	0.03359	0.32895
	15.29	0.03513	0.30154
	15.33	0.03549	0.27577
	15.37	0.034	0.25106
	15.41	0.03469	0.22865
	15.45	0.03556	0.20733
	15.49	0.03488	0.18828
	15.53	0.03428	0.17071
	15.57	0.03364	0.15513
	15.61	0.03386	0.14112
	15.65	0.03591	0.12852
	15.69	0.03554	0.11761
	15.73	0.0335	0.10804
	15.77	0.03364	0.10016
	15.81	0.03361	0.09329
	15.85	0.03347	0.08767
	15.89	0.03184	0.08309
	15.93	0.03095	0.07926
	15.97	0.03054	0.0762
	16.01	0.02976	0.07367
	16.05	0.02891	0.07186
	16.09	0.02888	0.07031
	16.13	0.02819	0.06891
	16.17	0.02664	0.06763
	16.21	0.02686	0.06645
	16.25	0.02652	0.06511
	16.29	0.02633	0.06374
	16.33	0.02615	0.06225
	16.37	0.02404	0.0605
	16.41	0.02507	0.05848
	16.45	0.02408	0.05643
	16.49	0.02487	0.05408
	16.53	0.02347	0.05158
	16.57	0.02237	0.04911
	16.61	0.02308	0.04659
	16.65	0.02413	0.04409
	16.69	0.02409	0.04183
	16.73	0.02386	0.03945
	16.77	0.02308	0.03704
	16.81	0.02186	0.03493
	16.85	0.022	0.03282
	16.89	0.02269	0.03104
	16.93	0.02188	0.02937
	16.97	0.02071	0.02792
	17.01	0.02142	0.02661
	17.05	0.01933	0.02533
	17.09	0.0194	0.02426
	17.13	0.01922	0.02331
	17.17	0.01903	0.02251
	17.21	0.01837	0.02182
	17.25	0.01853	0.02123
	17.29	0.01912	0.02078
	17.33	0.01791	0.02036
	17.37	0.01805	0.01992
	17.41	0.01796	0.01944
	17.45	0.01752	0.01909
	17.49	0.01747	0.01873
	17.53	0.0166	0.01843
	17.57	0.01724	0.01813
	17.61	0.0171	0.01787
	17.65	0.01651	0.01745
	17.69	0.01818	0.01715
	17.73	0.0189	0.0168
	17.77	0.01828	0.01656
	17.81	0.01832	0.0162
	17.85	0.01786	0.01599
	17.89	0.01793	0.01573
	17.93	0.01819	0.0154
	17.97	0.01671	0.01498
	18.01	0.01672	0.01463
	18.05	0.01603	0.01442
	18.09	0.0163	0.01415
	18.13	0.01598	0.01388
	18.17	0.01729	0.01344
	18.21	0.0169	0.01314
	18.25	0.01731	0.01287
	18.29	0.01827	0.01249
	18.33	0.01694	0.01225
	18.37	0.01628	0.01201
	18.41	0.01688	0.01171
	18.45	0.01662	0.01142
	18.49	0.01784	0.01118
	18.53	0.01757	0.01109
	18.57	0.01749	0.01091
	18.61	0.01667	0.01082
	18.65	0.01704	0.0107
	18.69	0.01747	0.01061
	18.73	0.02007	0.01049
	18.77	0.01924	0.01038
	18.81	0.02007	0.01052
	18.84	0.01981	0.01038
	18.88	0.02051	0.01047
	18.92	0.02029	0.01052
	18.96	0.02016	0.01058
	19	0.01926	0.01064
	19.04	0.01894	0.01067
	19.08	0.01926	0.01067
	19.12	0.02016	0.01058
	19.16	0.02002	0.01061
	19.2	0.0202	0.01064
	19.24	0.01951	0.01061
	19.28	0.02073	0.01052
	19.32	0.02089	0.01055
	19.36	0.02092	0.01055
	19.4	0.02091	0.0104
	19.44	0.02089	0.01038
	19.48	0.022	0.01038
	19.52	0.02179	0.01029
	19.56	0.0225	0.0102
	19.6	0.02076	0.01005
	19.64	0.02029	0.00999
	19.68	0.02039	0.00984
	19.72	0.02133	0.00963
	19.76	0.02268	0.00933
	19.8	0.02296	0.00904
	19.84	0.02239	0.00871
	19.88	0.02119	0.00823
	19.92	0.02046	0.00773
	19.96	0.02195	0.00731
	20	0.02034	0.00693

## Sheet: Fig. 3A
	Experiment with 5 uM FlaI			Excitation 285 nm, slidwith 10 nm Emission 450 nm, slidwith 10 nm
						Fluoresence	Fluoresence						Relative intensity with
		Fluoresence	Fluorescence	Fluorescence		in presesence of FlaI	in presesence of FlaI					FlaI Mant-ATP	Average 2,25 -7,39 uM
		without protein	in presence of FlaI	in presence of FlaI		background corrected	background corrected		Average	Standard		stoichiometry	990202
	Mant-ATP [uM]	[a.u.]	Exp 1	Exp 2		Exp 1	Exp 2			Deviation			Set to 100 %
	0	2100	76610	75360		74510	73260		73885	883.883		0	7.46161	0.089263
	0.13	2580	251650	251470		249070	248890		248980	127.279		0.026	25.1444	0.0128539
	0.26	3190	242890	249410		239700	246220		242960	4610.34		0.052	24.5364	0.465596
	0.39	3340	322790	323290		319450	319950		319700	353.553		0.078	32.2864	0.0357052
	0.52	3640	401750	399300		398110	395660		396885	1732.41		0.104	40.0812	0.174955
	0.65	4690	436710	436070		432020	431380		431700	452.548		0.13	43.5972	0.0457027
	0.77	4680	523180	504230		518500	499550		509025	13399.7		0.154	51.4062	1.35323
	0.89	5110	570260	551790		565150	546680		555915	13060.3		0.178	56.1416	1.31895
	1.01	5700	643170	624780		637470	619080		628275	13003.7		0.202	63.4492	1.31324
	1.13	6360	690950	687150		684590	680790		682690	2687.01		0.226	68.9446	0.271359
	1.25	6530	773130	754010		766600	747480		757040	13519.9		0.25	76.4531	1.36537
	1.48	7350	819260	836140		811910	828790		820350	11936		0.296	82.8468	1.20541
	1.71	8230	906600	906230		898370	898000		898185	261.63		0.342	90.7073	0.0264218
	1.93	8830	964320	947750		955490	938920		947205	11716.8		0.386	95.6578	1.18327
	2.25	10320	980180	976690		969860	966370		968115	2467.8		0.45	97.7695	0.249222
	2.56	11190	992390	992870		981200	981680		981440	339.411		0.512	99.1152	0.034277
	2.86	11590	997040	995340		985450	983750		984600	1202.08		0.572	99.4343	0.121398
	3.24	13730	1000440	996490		986710	982760		984735	2793.07		0.648	99.4479	0.282071
	3.78	15150	1019680	1013370		1004530	998220		1001375	4461.84		0.756	101.128	0.4506
	4.46	17820	1023580	1021600		1005760	1003780		1004770	1400.07		0.892	101.471	0.141393
	5.22	20160	1023520	1013010		1003360	992850		998105	7431.69		1.044	100.798	0.750523
	5.92	23290	1017970	1014770		994680	991480		993080	2262.74		1.184	100.291	0.228513
	6.55	23790	1017280	1016480		993490	992690		993090	565.685		1.31	100.292	0.0571283
	7.39	28650	1025680	1017030		997030	988380		992705	6116.47		1.478	100.253	0.6177
	Experiment with 100 nM FlaI			Excitation 350 nm, slidwith 5 nm Emission 450 nm, slidwith 5 nm
						Fluoresence	Fluoresence						Relative intensity with
		Fluoresence	Fluorescence	Fluorescence		in presesence of FlaI	in presesence of FlaI						Average 80 -7,39 uM
		without protein	in presence of FlaI	in presence of FlaI		background corrected	background corrected		Average	Standard			78047.3
	Mant-ATP [nM]	[a.u.]	Exp 1	Exp 2		Exp 1	Exp 2			Deviation			Set to 100 %
	0	4034	7307	8563		3273	4529		3901	888.126		0	4.99825	1.13793
	6.55738	8056	31728	34753		23672	26697		25184.5	2139		0.0655738	32.2683	2.74064
	12.9032	10676	48356	45346		37680	34670		36175	2128.39		0.129032	46.3501	2.72705
	19.0476	15358	64752	63612		49394	48254		48824	806.102		0.190476	62.5569	1.03284
	25	23441	89453	84583		66012	61142		63577	3443.61		0.25	81.4596	4.41221
	30.7692	28856	96830	108304		67974	79448		73711	8113.34		0.307692	94.444	10.3954
	36.3636	35407	104470	109435		69063	74028		71545.5	3510.79		0.363636	91.6694	4.49828
	41.791	38307	116231	115232		77924	76925		77424.5	706.4		0.41791	99.202	0.905092
	52.1739	48439	127445	123485		79006	75046		77026	2800.14		0.521739	98.6915	3.58775
	61.9718	56873	135120	132438		78247	75565		76906	1896.46		0.619718	98.5377	2.42989
	71.2329	65378	140045	144365		74667	78987		76827	3054.7		0.712329	98.4365	3.91391
	80	69422	149435	153782		80013	84360		82186.5	3073.79		0.8	105.303	3.93837
	88.3117	78263	153307	160734		75044	82471		78757.5	5251.68		0.883117	100.91	6.72885
	96.2025	86778	153814	167452		67036	80674		73855	9643.52		0.962025	94.6285	12.356
	110.843	101745	176655	175534		74910	73789		74349.5	792.667		1.10843	95.2621	1.01562
	124.138	119231	193745	188542		74514	69311		71912.5	3679.08		1.24138	92.1397	4.71391
	136.264	122214	218817	190023		96603	67809		82206	20360.4		1.36264	105.328	26.0873
	152.577	133928	215047	218937		81119	85009		83064	2750.65		1.52577	106.428	3.52433
	Experiment with 20 nM FlaI			Excitation 350 nm, slidwith 10 nm Emission 450 nm, slidwith 10 nm
						Fluoresence	Fluoresence						Relative intensity with
		Fluoresence	Fluorescence	Fluorescence		in presesence of FlaI	in presesence of FlaI						Average 80 -7,39 uM
		without protein	in presence of FlaI	in presence of FlaI		background corrected	background corrected		Average	Standard			94681.5	Standard
	Mant-ATP [nM]	[a.u.]	Exp 1	Exp 2		Exp 1	Exp 2			Deviation			Set to 100 %	deviation
	0	70376	72436	73322		2060	2946		2503	626.497		0	2.6436	0.661689
	1.31148	71479	93566	97431		22087	25952		24019.5	2732.97		0.0655738	25.3687	2.88649
	2.58065	70565	94988	88532		24423	17967		21195	4565.08		0.129032	22.3856	4.82151
	3.80952	76467	103367	127317		26900	50850		38875	16935.2		0.190476	41.0587	17.8865
	5	74527	146732	152498		72205	77971		75088	4077.18		0.25	79.3059	4.3062
	6.15385	75558	126753	148563		51195	73005		62100	15422		0.307692	65.5883	16.2883
	7.27273	77273	147670	166453		70397	89180		79788.5	13281.6		0.363636	84.2704	14.0276
	8.35821	78426	167876	155432		89450	77006		83228	8799.24		0.41791	87.9031	9.29351
	10.4348	89675	164557	163131		74882	73456		74169	1008.33		0.521739	78.3353	1.06497
	12.3944	81689	160141	158542		78452	76853		77652.5	1130.66		0.619718	82.0144	1.19418
	14.2466	89948	164518	175656		74570	85708		80139	7875.76		0.712329	84.6406	8.31816
	16	83459	167812	193549		84353	110090		97221.5	18198.8		0.8	102.683	19.2211
	17.6623	89451	199849	211909		110398	122458		116428	8527.71		0.883117	122.968	9.00673
	19.2405	85238	173438	194448		88200	109210		98705	14856.3		0.962025	104.25	15.6908
	22.1687	86436	175406	195456		88970	109020		98995	14177.5		1.10843	104.556	14.9739
	24.8276	86562	165955	190489		79393	103927		91660	17348.2		1.24138	96.8088	18.3226
	27.2527	96546	163995	184846		67449	88300		77874.5	14743.9		1.36264	82.2489	15.5721
	30.5155	99654	179549	183532		79895	83878		81886.5	2816.41		1.52577	86.4863	2.97461

## Sheet: Fig. 3B
	Fluoresence
	[a.u.]
ATP concentration	Exp 1	Exp 2	Average	SD
0	17000	17500	17250	353.553	#NUM!
1	16980	17570	17275	417.193	0
25	16560	15340	15950	862.67	1.39794
50	14290	14490	14390	141.421	1.69897
100	14420	15110	14765	487.904	2
250	13400	14460	13930	749.533	2.39794
500	12910	13790	13350	622.254	2.69897
750	11820	12160	11990	240.416	2.87506
1000	11510	10750	11130	537.401	3
2000	11660	11650	11655	7.07107	3.30103
2500	11080	11430	11255	247.487	3.39794
100000	9570	9240	9405	233.345	5

## Sheet: Fig. 3C
	ATPase activity
	Pi released (umol/mg protein/min)		Average
Temp	Exp 1	Exp 2		Standard deviation
37	<0.01	<0.01	0	0.01
50	1.18187	1.27893	1.2304	0.0686364
60	3.01653	2.65813	2.83733	0.253427
70	3.91253	3.92427	3.9184	0.00829664
80	2.9472	2.896	2.9216	0.0362038
90	0.452267	0.4896	0.470933	0.0263987

## Sheet: Fig. 3D
	ATPase activity
	Pi released (umol/mg protein/min)		Average
pH	Exp 1	Exp 2		Standard deviation
3	0.2216	0.1064	0.164	0.0814587
6	0.3128	1.094	0.703	0.552392
7	3.5612	3.458	3.51	0.0729735
8	4.0292	3.95	3.99	0.0560028
9	0.5288	1.178	0.853	0.459054
10	0.134	0.0727999	0.103	0.043275

## Sheet: Fig. 3E
	ATPase activity
ATP	umoles/min/mg of PfFlaI
[mM]	exp1	exp2	average	standard deviation
0.03125	0.747619	0	0.37381	0.528646
0.0625	0.985714	0.0904762	0.538095	0.633029
0.125	1.77143	0.471429	1.12143	0.919239
0.25	2.74762	1.44762	2.09762	0.919239
0.5	3.50952	2.99524	3.25238	0.363655
1	5.34286	4.85238	5.09762	0.346819
2	7.03333	5.49524	6.26429	1.0876
5	7.36667	6.94762	7.15714	0.296311

## Sheet: Fig. 4A
Volume	CTD PfFlaI	NTD PfFlaI	CTD+NTD PfFlaI
5.03	-0.00208	-0.00306	0.0008304
5.07	-0.00193	-0.00163	0.0006954
5.11	-0.00214	-0.00219	0.0007709
5.15	-0.00199	-0.00163	0.0007366
5.19	-0.00207	-0.00174	0.0007686
5.23	-0.00206	-0.00102	0.0006474
5.27	-0.00194	-0.00125	0.0006268
5.31	-0.00195	-0.0007557	0.0007137
5.35	-0.00202	-0.0008374	0.0007137
5.39	-0.0021	-0.000531	0.0008006
5.43	-0.00222	-0.0006332	0.0007778
5.47	-0.00214	-0.0004085	0.0007801
5.51	-0.00205	-0.0001838	0.0008052
5.55	-0.00208	0.0007149	0.0007915
5.59	-0.00191	0.0009191	0.0008578
5.63	-0.0018	0.00141	0.0009608
5.67	-0.00191	0.00194	0.0011
5.71	-0.00186	0.00225	0.00105
5.75	-0.0018	0.00192	0.0009631
5.79	-0.00185	0.00221	0.00102
5.83	-0.00178	0.0028	0.00102
5.87	-0.00186	0.00313	0.00101
5.91	-0.00163	0.00345	0.00112
5.95	-0.00148	0.00513	0.0008738
5.99	-0.0016	0.00441	0.000931
6.03	-0.00165	0.00511	0.0009219
6.07	-0.00156	0.006	0.00102
6.11	-0.00135	0.00743	0.00105
6.15	-0.00141	0.00711	0.00103
6.19	-0.00137	0.00821	0.00111
6.23	-0.00131	0.00858	0.00108
6.27	-0.0013	0.01058	0.00104
6.31	-0.00128	0.01038	0.00105
6.35	-0.00124	0.0097	0.00113
6.39	-0.00128	0.00995	0.00126
6.43	-0.00129	0.00942	0.0011
6.47	-0.00123	0.00927	0.00113
6.51	-0.00138	0.00931	0.00117
6.55	-0.00124	0.00982	0.00101
6.59	-0.0012	0.01062	0.00109
6.63	-0.00115	0.0098	0.00118
6.67	-0.00117	0.01021	0.00125
6.71	-0.00113	0.01105	0.00134
6.75	-0.00119	0.00935	0.00121
6.79	-0.00116	0.00976	0.00126
6.83	-0.00132	0.01066	0.00133
6.87	-0.00126	0.01074	0.00156
6.91	-0.00109	0.01009	0.0019
6.95	-0.0009537	0.01107	0.00254
6.99	-0.0009717	0.00972	0.00334
7.03	-0.0007707	0.00929	0.00459
7.07	-0.0005578	0.00942	0.00636
7.11	-0.0002759	0.00968	0.00826
7.15	0.0002189	0.01015	0.01036
7.19	0.0005428	0.01056	0.01262
7.23	0.0008457	0.01095	0.01493
7.27	0.00105	0.01095	0.01735
7.31	0.00132	0.01083	0.01962
7.35	0.00145	0.01029	0.0218
7.39	0.00148	0.01174	0.02389
7.43	0.00169	0.01062	0.02579
7.47	0.00168	0.01013	0.02752
7.51	0.00177	0.01113	0.0289
7.55	0.00201	0.01117	0.03002
7.59	0.00214	0.01121	0.03082
7.63	0.00238	0.01191	0.03118
7.67	0.00256	0.01134	0.03144
7.71	0.00276	0.01205	0.03156
7.75	0.00302	0.01285	0.03126
7.79	0.00336	0.0124	0.0309
7.83	0.00387	0.01299	0.03065
7.87	0.0042	0.0136	0.03028
7.91	0.00495	0.01366	0.03001
7.95	0.00571	0.0142	0.02991
7.99	0.00649	0.01573	0.03023
8.03	0.00712	0.0155	0.0309
8.07	0.00776	0.01552	0.03221
8.1	0.00807	0.01681	0.03406
8.14	0.00865	0.0194	0.03673
8.18	0.00872	0.02063	0.04016
8.22	0.00873	0.02198	0.04433
8.26	0.00857	0.02463	0.04957
8.3	0.00833	0.02529	0.05624
8.34	0.00815	0.02751	0.06465
8.38	0.00767	0.03056	0.07521
8.42	0.00754	0.03348	0.08794
8.46	0.00719	0.03793	0.10363
8.5	0.00704	0.04254	0.12183
8.54	0.00689	0.04734	0.1432
8.58	0.00669	0.05335	0.1672
8.62	0.00653	0.05978	0.19389
8.66	0.00654	0.06607	0.22246
8.7	0.00638	0.07283	0.25278
8.74	0.0063	0.07817	0.28411
8.78	0.00646	0.08421	0.31701
8.82	0.00638	0.08971	0.35198
8.86	0.00648	0.0942	0.38984
8.9	0.00663	0.09884	0.43089
8.94	0.00663	0.10329	0.47588
8.98	0.00674	0.10799	0.52397
9.02	0.00672	0.11193	0.57455
9.06	0.0066	0.11509	0.6249
9.1	0.0068	0.12042	0.67369
9.14	0.0069	0.12655	0.71818
9.18	0.00694	0.1344	0.75637
9.22	0.00684	0.14142	0.78843
9.26	0.00681	0.15088	0.81251
9.3	0.00686	0.1615	0.83022
9.34	0.00695	0.17292	0.84229
9.38	0.00672	0.18468	0.85085
9.42	0.0066	0.19988	0.85789
9.46	0.00662	0.21181	0.864
9.5	0.00656	0.22567	0.87206
9.54	0.00666	0.2392	0.88264
9.58	0.00665	0.2557	0.89545
9.62	0.00671	0.27333	0.91114
9.66	0.00692	0.2941	0.92867
9.7	0.00718	0.31908	0.94745
9.74	0.00759	0.35192	0.96585
9.78	0.00841	0.39387	0.98158
9.82	0.00942	0.44471	0.9934
9.86	0.01064	0.50558	0.99999
9.9	0.01247	0.57461	0.9995
9.94	0.01446	0.64833	0.99223
9.98	0.01701	0.72529	0.97632
10.02	0.01942	0.79706	0.9532
10.06	0.02187	0.86375	0.92266
10.1	0.02448	0.91822	0.88709
10.14	0.02668	0.96105	0.8469
10.18	0.02863	0.98866	0.80408
10.22	0.02982	1.00004	0.75923
10.26	0.03084	0.9981	0.71447
10.3	0.03156	0.98207	0.67015
10.34	0.03183	0.95415	0.62786
10.38	0.03199	0.91775	0.58765
10.42	0.03202	0.87482	0.55001
10.46	0.03179	0.82823	0.51491
10.5	0.0314	0.7808	0.48253
10.54	0.03093	0.73066	0.45286
10.58	0.03037	0.68329	0.42571
10.62	0.02976	0.63552	0.40173
10.66	0.02913	0.59065	0.38083
10.7	0.02845	0.54839	0.36366
10.74	0.02765	0.50991	0.34999
10.78	0.02683	0.47416	0.34022
10.82	0.02637	0.4406	0.33391
10.86	0.02551	0.41277	0.33106
10.9	0.02483	0.38836	0.33119
10.94	0.02452	0.36767	0.3332
10.98	0.02486	0.35125	0.33649
11.02	0.02568	0.33952	0.33986
11.06	0.02732	0.33164	0.34266
11.1	0.03039	0.32541	0.34373
11.14	0.03572	0.32449	0.34226
11.18	0.04359	0.32623	0.33792
11.22	0.05615	0.3289	0.33089
11.26	0.07469	0.33266	0.32073
11.3	0.10166	0.33719	0.30779
11.34	0.14063	0.34295	0.29309
11.38	0.19337	0.34808	0.27719
11.42	0.26245	0.354	0.26012
11.46	0.34579	0.36093	0.24305
11.5	0.4436	0.36587	0.22611
11.54	0.54868	0.37181	0.20987
11.58	0.65606	0.37835	0.19432
11.62	0.75732	0.38331	0.17962
11.66	0.84668	0.3847	0.1657
11.7	0.91743	0.38697	0.15256
11.74	0.9675	0.38495	0.14035
11.78	0.99477	0.38054	0.12913
11.82	1	0.37196	0.11867
11.86	0.98555	0.36213	0.10899
11.9	0.95566	0.34943	0.10027
11.94	0.91369	0.33442	0.09246
11.98	0.86268	0.31775	0.08563
12.02	0.8069	0.2999	0.07957
12.06	0.74868	0.28378	0.07453
12.1	0.69041	0.2656	0.07048
12.14	0.63384	0.24933	0.0674
12.18	0.57974	0.23374	0.06539
12.22	0.52937	0.22028	0.06412
12.26	0.4822	0.20729	0.06365
12.3	0.43882	0.19436	0.06381
12.34	0.39871	0.1836	0.0641
12.38	0.36226	0.17249	0.06457
12.42	0.3285	0.16266	0.06493
12.46	0.29824	0.15276	0.06493
12.5	0.2702	0.14406	0.06449
12.54	0.24492	0.13587	0.06374
12.58	0.22145	0.12868	0.06256
12.62	0.20043	0.12173	0.06094
12.66	0.18105	0.11524	0.05917
12.7	0.16366	0.10958	0.05711
12.74	0.14771	0.10386	0.05507
12.78	0.13327	0.099	0.05306
12.82	0.12021	0.09569	0.05123
12.86	0.1084	0.09067	0.04938
12.9	0.09781	0.0875	0.04771
12.94	0.0883	0.08337	0.04625
12.98	0.07989	0.08078	0.04499
13.02	0.0723	0.07915	0.04382
13.06	0.06563	0.07631	0.04288
13.1	0.05973	0.07461	0.04201
13.14	0.0544	0.07259	0.04125
13.18	0.04973	0.07114	0.04058
13.22	0.04575	0.0693	0.04
13.26	0.04228	0.06814	0.03932
13.3	0.03918	0.06779	0.03869
13.34	0.03636	0.06716	0.03809
13.38	0.03393	0.06577	0.03755
13.42	0.0318	0.06452	0.0369
13.46	0.03006	0.06397	0.03622
13.49	0.02823	0.06256	0.03561
13.53	0.02665	0.06223	0.03493
13.57	0.02552	0.05956	0.03438
13.61	0.02433	0.05925	0.0338
13.65	0.02323	0.05805	0.03308
13.69	0.02225	0.05772	0.03248
13.73	0.02146	0.05652	0.03194
13.77	0.02072	0.05541	0.0312
13.81	0.01999	0.05409	0.03072
13.85	0.01932	0.05355	0.03014
13.89	0.01879	0.05398	0.02949
13.93	0.01824	0.05239	0.02881
13.97	0.01768	0.05096	0.02813
14.01	0.01735	0.05082	0.02749
14.05	0.01691	0.0501	0.02682
14.09	0.01638	0.0501	0.02617
14.13	0.01597	0.05018	0.0255
14.17	0.01583	0.04879	0.0248
14.21	0.01535	0.04753	0.02413
14.25	0.01501	0.0473	0.02358
14.29	0.01495	0.04879	0.02293
14.33	0.01459	0.04847	0.02225
14.37	0.01433	0.04698	0.0217
14.41	0.01395	0.04657	0.02105
14.45	0.01406	0.04643	0.02069
14.49	0.0136	0.04651	0.02011
14.53	0.0134	0.04577	0.01967
14.57	0.01321	0.04498	0.01926
14.61	0.01287	0.04506	0.01882
14.65	0.01266	0.04455	0.01837
14.69	0.01253	0.04471	0.01796
14.73	0.01248	0.04514	0.01754
14.77	0.01229	0.04502	0.01708
14.81	0.01222	0.04428	0.01676
14.85	0.01197	0.04326	0.01649
14.89	0.01189	0.04381	0.01621
14.93	0.01171	0.04359	0.016
14.97	0.01164	0.04322	0.01567
15.01	0.01158	0.04269	0.01544
15.05	0.01158	0.0431	0.01513
15.09	0.01138	0.04363	0.015
15.13	0.01124	0.0441	0.01478
15.17	0.01111	0.0442	0.01457
15.21	0.01112	0.04402	0.01451
15.25	0.01102	0.0434	0.01438
15.29	0.01102	0.04383	0.01425
15.33	0.0112	0.04406	0.01416
15.37	0.01107	0.04477	0.01402
15.41	0.01102	0.04438	0.01397
15.45	0.01086	0.0443	0.01384
15.49	0.01064	0.04491	0.01375
15.53	0.01073	0.04432	0.01377
15.57	0.01046	0.04373	0.01367
15.61	0.01037	0.04391	0.01354
15.65	0.01031	0.04344	0.01343
15.69	0.01036	0.04385	0.01331
15.73	0.01056	0.04375	0.01324
15.77	0.01063	0.04367	0.01327
15.81	0.01059	0.04414	0.01325
15.85	0.01066	0.04306	0.01327
15.89	0.01071	0.04312	0.01343
15.93	0.01071	0.04412	0.01336
15.97	0.01084	0.04412	0.01333
16.01	0.01083	0.04342	0.01354
16.05	0.01099	0.04326	0.01361
16.09	0.01096	0.04373	0.01359
16.13	0.01105	0.04428	0.01342
16.17	0.01104	0.04416	0.01339
16.21	0.0109	0.04428	0.01327
16.25	0.01082	0.04496	0.01324
16.29	0.01087	0.0451	0.0131
16.33	0.01089	0.04577	0.01288
16.37	0.01079	0.04612	0.01279
16.41	0.01059	0.04487	0.0127
16.45	0.01042	0.04545	0.01255
16.49	0.01043	0.04547	0.01227
16.53	0.01029	0.04585	0.01213
16.57	0.01009	0.0454	0.01192
16.61	0.01005	0.04453	0.01181
16.65	0.00992	0.04516	0.01171
16.69	0.0098	0.04483	0.01168
16.73	0.00991	0.04473	0.0114
16.77	0.0099	0.04514	0.01137
16.81	0.00995	0.04598	0.01131
16.85	0.00978	0.04563	0.01137
16.89	0.00994	0.04463	0.01156
16.93	0.01011	0.04542	0.01168
16.97	0.00997	0.04526	0.01185
17.01	0.01004	0.04502	0.01203
17.05	0.01041	0.04457	0.01229
17.09	0.01027	0.04465	0.01255
17.13	0.01056	0.04498	0.01292
17.17	0.01085	0.04446	0.0133
17.21	0.01106	0.04512	0.01376
17.25	0.0113	0.04518	0.01429
17.29	0.0116	0.04489	0.01485
17.33	0.01207	0.04534	0.01561
17.37	0.01259	0.04608	0.01641
17.41	0.01294	0.04522	0.01718
17.45	0.01325	0.04451	0.01782
17.49	0.01347	0.04489	0.0184
17.53	0.01359	0.04524	0.01882
17.57	0.01355	0.04487	0.01911
17.61	0.01367	0.04549	0.01906
17.65	0.01353	0.04526	0.01911
17.69	0.01339	0.04514	0.01904
17.73	0.01325	0.04475	0.01897
17.77	0.01328	0.04512	0.01863
17.81	0.01308	0.04526	0.01857
17.85	0.01299	0.04547	0.01833
17.89	0.01285	0.04638	0.0183
17.93	0.01266	0.04602	0.01834
17.97	0.01253	0.04614	0.01819
18.01	0.01241	0.04563	0.01791
18.05	0.0124	0.04614	0.01774
18.09	0.01233	0.04508	0.01751
18.13	0.01205	0.04571	0.01728
18.17	0.01196	0.04465	0.01685
18.21	0.01206	0.04397	0.01639
18.25	0.01204	0.04361	0.01605
18.29	0.0119	0.04326	0.01549
18.33	0.01141	0.04312	0.01507
18.37	0.0115	0.04269	0.01459
18.41	0.01148	0.04367	0.0142
18.45	0.01117	0.04324	0.01374
18.49	0.01103	0.04199	0.01347
18.53	0.0108	0.04218	0.01302
18.57	0.01053	0.04252	0.01261
18.61	0.01031	0.04299	0.01228
18.65	0.01034	0.04232	0.0119
18.69	0.01016	0.04252	0.01158
18.73	0.01031	0.04177	0.01113
18.77	0.01043	0.04271	0.01104
18.81	0.01081	0.04185	0.01066
18.84	0.01093	0.04236	0.0105
18.88	0.01093	0.04299	0.01027
18.92	0.01087	0.04334	0.01022
18.96	0.01074	0.04338	0.01024
19	0.01056	0.04369	0.01012
19.04	0.01052	0.0443	0.01013
19.08	0.01029	0.04397	0.01027
19.12	0.01016	0.04418	0.01056
19.16	0.01023	0.04461	0.01096
19.2	0.01032	0.0453	0.01176
19.24	0.01032	0.04502	0.01295
19.28	0.01031	0.04506	0.01455
19.32	0.01052	0.04524	0.01606
19.36	0.01073	0.04632	0.01688
19.4	0.01104	0.04773	0.01703
19.44	0.01124	0.04853	0.01663
19.48	0.01114	0.04955	0.01596
19.52	0.01149	0.04873	0.01513
19.56	0.01161	0.04996	0.01413
19.6	0.01171	0.05059	0.0134
19.64	0.01179	0.05016	0.01287
19.68	0.01189	0.05125	0.01246
19.72	0.01202	0.05078	0.01225
19.76	0.01198	0.05141	0.01217
19.8	0.01204	0.05071	0.01224
19.84	0.01212	0.05012	0.01246
19.88	0.01228	0.05065	0.01243
19.92	0.01222	0.05065	0.01253
19.96	0.0123	0.04988	0.0129
20	0.01213	0.04982	0.01308
					--	--	--	--
					--	--	--	--
					--	--	--	--
					--	--	--	--
					--	--	--	--
					--	--	--	--
					--	--	--	--
					--	--	--	--
					--	--	--	--
					--	--	--	--
					--	--	--	--
					--	--	--	--
					--	--	--	--
					--	--	--	--
					--	--	--	--
					--	--	--	--
					--	--	--	--
					--	--	--	--
					--	--	--	--
					--	--	--	--
					--	--	--	--
					--	--	--	--
					--	--	--	--
					--	--	--	--
					--	--	--	--
					--	--	--	--
					--	--	--	--
					--	--	--	--
					--	--	--	--
					--	--	--	--
					--	--	--	--
					--	--	--	--
					--	--	--	--
					--	--	--	--
					--	--	--	--
					--	--	--	--
					--	--	--	--
					--	--	--	--
					--	--	--	--
					--	--	--	--
					--	--	--	--
					--	--	--	--
					--	--	--	--
					--	--	--	--
					--	--	--	--
					--	--	--	--
					--	--	--	--
					--	--	--	--
					--	--	--	--
					--	--	--	--
					--	--	--	--
					--	--	--	--
					--	--	--	--
					--	--	--	--
					--	--	--	--
					--	--	--	--
					--	--	--	--
					--	--	--	--
					--	--	--	--
					--	--	--	--
					--	--	--	--
					--	--	--	--
					--	--	--	--
					--	--	--	--
					--	--	--	--
					--	--	--	--
					--	--	--	--
					--	--	--	--
					--	--	--	--
					--	--	--	--
					--	--	--	--
					--	--	--	--
					--	--	--	--
					--	--	--	--
					--	--	--	--
					--	--	--	--
					--	--	--	--
					--	--	--	--
					--	--	--	--
					--	--	--	--
					--	--	--	--
					--	--	--	--
					--	--	--	--
					--	--	--	--
					--	--	--	--
					--	--	--	--
					--	--	--	--
					--	--	--	--
					--	--	--	--
					--	--	--	--
					--	--	--	--
					--	--	--	--
					--	--	--	--
					--	--	--	--
					--	--	--	--
					--	--	--	--
					--	--	--	--
					--	--	--	--
					--	--	--	--
					--	--	--	--
					--	--	--	--
					--	--	--	--
					--	--	--	--
					--	--	--	--
					--	--	--	--
					--	--	--	--
					--	--	--	--
					--	--	--	--
					--	--	--	--
					--	--	--	--
					--	--	--	--
					--	--	--	--
					--	--	--	--
					--	--	--	--
					--	--	--	--
					--	--	--	--
					--	--	--	--
					--	--	--	--
					--	--	--	--
					--	--	--	--
					--	--	--	--
					--	--	--	--
					--	--	--	--
					--	--	--	--
					--	--	--	--
					--	--	--	--
					--	--	--	--
					--	--	--	--
					--	--	--	--
					--	--	--	--
					--	--	--	--
					--	--	--	--
					--	--	--	--
					--	--	--	--
					--	--	--	--
					--	--	--	--
					--	--	--	--
					--	--	--	--
					--	--	--	--
					--	--	--	--
					--	--	--	--
					--	--	--	--
					--	--	--	--
					--	--	--	--
					--	--	--	--
					--	--	--	--
					--	--	--	--
					--	--	--	--
					--	--	--	--
					--	--	--	--
					--	--	--	--
					--	--	--	--
					--	--	--	--
					--	--	--	--
					--	--	--	--
					--	--	--	--
					--	--	--	--
					--	--	--	--
					--	--	--	--
					--	--	--	--
					--	--	--	--
					--	--	--	--
					--	--	--	--
					--	--	--	--
					--	--	--	--
					--	--	--	--
					--	--	--	--
					--	--	--	--
					--	--	--	--
					--	--	--	--
					--	--	--	--
					--	--	--	--
					--	--	--	--
					--	--	--	--
					--	--	--	--
					--	--	--	--
					--	--	--	--
					--	--	--	--
					--	--	--	--
					--	--	--	--
					--	--	--	--
					--	--	--	--
					--	--	--	--
					--	--	--	--
					--	--	--	--
					--	--	--	--
					--	--	--	--
					--	--	--	--
					--	--	--	--
					--	--	--	--
					--	--	--	--
					--	--	--	--
					--	--	--	--
					--	--	--	--
					--	--	--	--
					--	--	--	--
					--	--	--	--
					--	--	--	--
					--	--	--	--
					--	--	--	--
					--	--	--	--
					--	--	--	--
					--	--	--	--
					--	--	--	--
					--	--	--	--
					--	--	--	--
					--	--	--	--
					--	--	--	--
					--	--	--	--
					--	--	--	--
					--	--	--	--
					--	--	--	--
					--	--	--	--
					--	--	--	--
					--	--	--	--
					--	--	--	--
					--	--	--	--
					--	--	--	--
					--	--	--	--
					--	--	--	--
					--	--	--	--
					--	--	--	--
					--	--	--	--
					--	--	--	--
					--	--	--	--
					--	--	--	--
					--	--	--	--
					--	--	--	--
					--	--	--	--
					--	--	--	--
					--	--	--	--
					--	--	--	--
					--	--	--	--
					--	--	--	--
					--	--	--	--
					--	--	--	--
					--	--	--	--
					--	--	--	--
					--	--	--	--
					--	--	--	--
					--	--	--	--
					--	--	--	--
					--	--	--	--
					--	--	--	--
					--	--	--	--
					--	--	--	--
					--	--	--	--
					--	--	--	--
					--	--	--	--
					--	--	--	--
					--	--	--	--
					--	--	--	--
					--	--	--	--
					--	--	--	--
					--	--	--	--
					--	--	--	--
					--	--	--	--
					--	--	--	--
					--	--	--	--
					--	--	--	--
					--	--	--	--
					--	--	--	--
					--	--	--	--
					--	--	--	--
					--	--	--	--
					--	--	--	--
					--	--	--	--
					--	--	--	--
					--	--	--	--
					--	--	--	--
					--	--	--	--
					--	--	--	--
					--	--	--	--
					--	--	--	--
					--	--	--	--
					--	--	--	--
					--	--	--	--
					--	--	--	--
					--	--	--	--
					--	--	--	--
					--	--	--	--
					--	--	--	--
					--	--	--	--
					--	--	--	--
					--	--	--	--
					--	--	--	--
					--	--	--	--
					--	--	--	--
					--	--	--	--
					--	--	--	--
					--	--	--	--
					--	--	--	--
					--	--	--	--
					--	--	--	--
					--	--	--	--
					--	--	--	--
					--	--	--	--
					--	--	--	--
					--	--	--	--
					--	--	--	--
					--	--	--	--
					--	--	--	--
					--	--	--	--
					--	--	--	--
					--	--	--	--
					--	--	--	--
					--	--	--	--
					--	--	--	--
					--	--	--	--
					--	--	--	--
					--	--	--	--
					--	--	--	--
					--	--	--	--
					--	--	--	--
					--	--	--	--
					--	--	--	--
					--	--	--	--
					--	--	--	--
					--	--	--	--
					--	--	--	--
					--	--	--	--
					--	--	--	--
					--	--	--	--
					--	--	--	--
					--	--	--	--
					--	--	--	--
					--	--	--	--
					--	--	--	--
					--	--	--	--
					--	--	--	--
					--	--	--	--
					--	--	--	--
					--	--	--	--
					--	--	--	--
					--	--	--	--
					--	--	--	--
					--	--	--	--
					--	--	--	--
					--	--	--	--
					--	--	--	--
					--	--	--	--
					--	--	--	--
					--	--	--	--
					--	--	--	--
					--	--	--	--
					--	--	--	--
					--	--	--	--
					--	--	--	--
					--	--	--	--
					--	--	--	--
					--	--	--	--
					--	--	--	--
					--	--	--	--
					--	--	--	--
					--	--	--	--
					--	--	--	--
					--	--	--	--
					--	--	--	--
					--	--	--	--
					--	--	--	--
					--	--	--	--
					--	--	--	--
					--	--	--	--
					--	--	--	--
					--	--	--	--
					--	--	--	--
					--	--	--	--
					--	--	--	--
					--	--	--	--
					--	--	--	--
					--	--	--	--
					--	--	--	--
					--	--	--	--
					--	--	--	--
					--	--	--	--
					--	--	--	--
					--	--	--	--
					--	--	--	--
					--	--	--	--
					--	--	--	--
					--	--	--	--
					--	--	--	--
					--	--	--	--
					--	--	--	--
					--	--	--	--
					--	--	--	--
					--	--	--	--
					--	--	--	--
					--	--	--	--
					--	--	--	--
					--	--	--	--
					--	--	--	--
					--	--	--	--
					--	--	--	--
					--	--	--	--
					--	--	--	--
					--	--	--	--

## Sheet: Fig. 4C
	ATPase activity		Average	Standard deviation
	Pi released (umol/mg protein/min)
pH	Exp 1	Exp 2
FlaIwt	5.784	6.054	5.919	0.190919
PfFlaI-NTD	<0.01	<0.01	0	0.01
pfFlaI-CTD	-0.48	-0.4836	-0.4818	0.00254558
N+C PfFlaI	1.41	1.14	1.275	0.190919

## Sheet: Fig. 5A
		ATPase activity					Relative activity
		Pi released (umol/mg protein/min)					compared to WT
PfFlaI	PfFlaH	Exp 1	Exp 2	Exp 3	Average	Standard deviation	%	Standard deviation
WT	-	3.82	4.24	3.62	3.89333	0.316439	100	8.1277
E336A	-	0.06	0.06	0.18	0.1	0.069282	2.56849	1.7795
-	WT	<0.01	<0.01	<0.01	0	0.01	<0.25	0.25
-	K39A	<0.01	<0.01	<0.01	0	0.01	<0.25	0.25
-	D126N	<0.01	<0.01	<0.01	0	0.01	<0.25	0.25
WT	WT	6.66	6.68	6.48	6.60667	0.110151	169.692	2.82923
WT	K39A	3.98	4.24	4.02	4.08	0.14	104.795	3.59589
WT	D126N	4.1	3.8	3.52	3.80667	0.290057	97.774	7.45011
E366A	WT	0.1	0.08	0.1	0.0933333	0.011547	2.39726	0.296584

## Sheet: Fig. 5B
		ATPase activity					Relative activity compared to WT
PfFlaI	PfFlaH	Pi released (umol/mg protein/min)
uM	uM	Exp 1	Exp 2	Exp 3	Average	SD		SD
1	0	4.27447	4.1	3.66383	4.01277	0.314527	100	7.83815
1	0.2	3.66383	3.92553	3.75106	3.78014	0.133252	94.2029	3.32071
1	0.4	4.18723	4.71064	4.44894	4.44894	0.261702	110.87	6.52174
1	0.6	6.28085	5.93191	5.23404	5.8156	0.533009	144.928	13.2828
1	0.8	6.45532	6.19362	6.62979	6.42624	0.219534	160.145	5.47089
1	1.1	6.45532	6.28085	6.89149	6.54255	0.314527	163.043	7.83815
1	2.2	5.40851	5.32128	5.49574	5.40851	0.087234	134.783	2.17391
1	3.3	4.18723	4.27447	5.05957	4.50709	0.480448	112.319	11.973
1	4.4	4.27447	4.18723	4.27447	4.24539	0.0503646	105.797	1.25511
1	5.5	3.22766	3.66383	3.92553	3.60567	0.352552	89.8551	8.78576
		ATPase activity					Relative activity compared to WT
PfFlaI	PfFlaH	Pi released (umol/mg protein/min)
uM	uM	Exp 1	Exp 2	Exp 3	Average	SD		SD
1	0	4.5614	4	4.03509	4.19883	0.314487	104.637	7.83717
1	0.2	4.84211	4.52632	4.94737	4.77193	0.219123	118.919	5.46064
1	0.4	4.73684	4.10526	4.52632	4.45614	0.321584	111.049	8.01403
1	0.6	4.91228	4.2807	4.24561	4.47953	0.375182	111.632	9.3497
1	0.8	4.52632	4.07018	3.92982	4.17544	0.311866	104.054	7.77186
1	1.1	4.63158	4.42105	4.63158	4.5614	0.121547	113.672	3.02902
1	2.2	4.42105	4.24561	4.35088	4.33918	0.0883022	108.134	2.20053
1	3.3	4.5614	4.35088	4.14035	4.35088	0.210526	108.426	5.24641
1	4.4	4.73684	4.35088	4.38596	4.49123	0.21343	111.923	5.31878
1	5.5	4.5614	3.92982	4.03509	4.17544	0.338374	104.054	8.43243
		ATPase activity					Relative activity compared to WT
PfFlaI	PfFlaH	Pi released (umol/mg protein/min)
uM	uM	Exp 1	Exp 2	Exp 3	Average	SD		SD
		4.22773	3.9	4.42437	4.18403	0.264902	104.268	6.60148
1	0.2	4.35882	4.55546	4.62101	4.51176	0.136445	112.435	3.40028
1	0.4	4.16218	3.83445	4.65378	4.21681	0.412386	105.085	10.2768
1	0.6	4.32605	4.32605	4.68655	4.44622	0.208137	110.802	5.18688
1	0.8	4.45714	4.22773	4.85042	4.51176	0.314918	112.435	7.84789
1	1.1	4.42437	3.96555	4.48992	4.29328	0.285709	106.99	7.12001
1	2.2	4.29328	3.99832	4.35882	4.21681	0.192033	105.085	4.78555
1	3.3	3.86723	3.67059	3.86723	3.80168	0.113529	94.7397	2.82921
1	4.4	4.29328	3.9	4.06387	4.08571	0.197547	101.818	4.92296
1	5.5	3.86723	3.63782	4.06387	3.8563	0.213235	96.1009	5.31392

[truncated: 1 more sheets: Fig. 6]
